“Preprint”

# **Influence of normobaric hypoxic exercise on endothelial progenitor cell senescence by *in vitro* cultivation with conditioned media**

Jan-Frieder Harmsen<sup>1,2</sup>; Dennis Nebe<sup>1</sup>; Klara Brixius<sup>1</sup>; Alexander Schenk<sup>1</sup>; Wilhelm Bloch<sup>1,3</sup>

<sup>1</sup>Department of Molecular and Cellular Sports Medicine, German Sport University Cologne, Cologne, Germany

<sup>2</sup>Department of Nutrition and Movement Sciences, School of Nutrition and Translational Research in Metabolism, Maastricht University Medical Center, Maastricht, The Netherlands

<sup>3</sup>The German Research Centre of Elite Sport, German Sport University Cologne, Cologne, Germany

## **Address of correspondence:**

Jan-Frieder Harmsen, M.Sc

Department of Molecular and Cellular Sport Medicine

German Sport University Cologne

Am Sportpark Müngersdorf 6

50933 Cologne, Germany

E-Mail: [janfrieder.harmsen@gmail.com](mailto:janfrieder.harmsen@gmail.com)

## Abstract

**Objective:** Circulating endothelial progenitor cells (EPCs) were shown to be affected in cardiovascular and metabolic diseases. As interventional strategies, hypoxia and exercise are both known to increase the number and enhance the function of EPCs, potentially by extending their lifespan induced by a reduced senescence. Therefore, this pilot study investigated the effect of exercise under normobaric hypoxia on the senescence of EPCs by *in vitro* cultivation with autologous human serum (AHS).

**Methods:** Four healthy trained young males ( $23 \pm 2$  years) performed an incremental cycling step test until exhaustion in a normobaric hypoxic-chamber with an average altitude of 4,000 m ( $O_2$  12.3%). Blood serum was taken at pre, 10 min post and 4 h post, which was later used for *in vitro* cultivation of EPCs. Senescence was investigated by  $\beta$ -galactosidase staining.

**Results:** The participants spent 30-40 min in normobaric hypoxia. The EPC senescence rate was reduced 10 min ( $0.72 \pm 0.57\%$ ) and 4 hours ( $0.67 \pm 0.52\%$ ) after exercise compared to pre ( $1.89 \pm 0.37\%$ ).

**Conclusion:** This pilot study indicates that intense exercise under normobaric hypoxia may enhance EPC function by slowing down their senescence.

**Key words:** EPC; CPC; FBS; AHS; hypoxic exercise; senescence

## 19     **Introduction**

20     Endothelial progenitor cells (EPCs) are described as CD34<sup>+</sup> Flk-1<sup>+</sup> possessing the ability to  
 21     differentiate into endothelial cells *in vitro* and thereby integrate into sites of active  
 22     angiogenesis [1,2]. Stimuli inducing the release of EPCs from bone marrow into the  
 23     circulation include acute injury, tissue ischemia, tumor angiogenesis and myocardial  
 24     infarction [3]. In the last two decades, EPCs became a promising target of regenerative  
 25     medicine research and several interventional approaches have been performed to investigate  
 26     the mobilization of EPCs. In particular, abundant research has been conducted showing  
 27     enhanced levels of circulating EPCs after exercise interventions in patients [4–6] as well as in  
 28     the healthy population [7,8].

29     Besides physical exercise, the exposition to normobaric hypoxia for a short time period (1  
 30     hour) was also shown to be sufficient to increase EPCs in the circulation [9]. Thus, combining  
 31     exercise and hypoxia in an attempt to maximize the stimulus of oxygen deprivation has even  
 32     been shown to be superior to normobaric exercise in terms of cardiac and muscular  
 33     adaptations possibly by enhancing EPC mobilization [10]. For the purpose of determining the  
 34     optimal exercise stimulus in hypoxia, Tsai and colleagues [7] identified high intensity interval  
 35     training to stimulate EPC production more than high volume training.

36     Independent of an upregulation of EPC formation, physical exercise and/or hypoxia may  
 37     enhance EPC count indirectly by extending their lifespan [11] represented by downregulated  
 38     cell senescence factors. However, the direct effect of exercise under normobaric hypoxia  
 39     specifically on the senescence of EPCs has not been studied to date. Therefore, the aim of this  
 40     pilot study was to investigate the influence of acute exhausting exercise under normobaric  
 41     hypoxia by *in vitro* cultivation of EPCs with autologous human serum.

42

43

## 44 **Methods and materials**

45 *Participants.* Four healthy male sport students participated in this study. Characteristics of  
46 basic anthropometric and physical parameters of the participants are summarized in Table 1.  
47 All participants abstained from alcohol consumption for 24 h before the intervention and were  
48 nonsmokers. All participants gave written informed consent to contribute to the study. The  
49 study has been performed according to the Declaration of Helsinki, and the local institutional  
50 review board has approved the procedures.

51 --- Table 1 around here ---

52 *Exercise study protocol.* Every subject performed an incremental cycling step test until  
53 exhaustion under normobaric hypoxia. Before the test started, participants performed a 10 min  
54 warm-up at 70 W and rested for 5 min afterwards. The intensity of the subsequent test started  
55 at 100 W and was increased every three minutes by 30 W. Participants had to maintain a  
56 pedal rate of 70-80 rpm. The test was aborted as soon as the pedal rate dropped below 60 rpm.  
57 A Cyclus 2 (RBM Elektronik, Automation, Leipzig, Germany) cycling ergometer was used  
58 for the incremental cycling test. The hypoxic condition was induced by using a normobaric  
59 hypoxic-chamber (Hypoxic Training Systems, Hypoxico, New York) with an average altitude  
60 of 4,000 m (O<sub>2</sub> 12.3%). Further information can be obtained from Suhr and colleagues [12] as  
61 the same altitude chamber and system to determine maximal oxygen uptake (VO<sub>2 peak</sub>) was  
62 used.

63

64 *Blood sampling and serum preparation.* Blood samples were taken by venipuncture before  
65 (pre-), 10 min post- and 4 h post-exercise. Blood was drawn into SST vacutainer (Becton  
66 Dickinson GmbH, Heidelberg, Germany) for serum preparation. Blood samples in SST  
67 vacutainers were stored at 7°C for 30 min for blood clotting and then centrifuged for 10 min

68 at 1861xg and 4°C for serum preparation. The blood serum was aliquoted and stored at -80°C  
69 until use.

70

71 *Isolation of EPCs from whole blood.* EDTA blood samples were taken from each participant  
72 for isolation of peripheral blood mononuclear cells (PBMCs) at rest. PBMCs were isolated by  
73 centrifugation for 30 min at 800xg with a lymphocyte separation medium (PAA Laboratories  
74 GmbH, Cölbe, Germany). EPC isolation was modified from Funke et al. 2008 [13]. In brief,  
75 PBMCs were cultivated in 24-well plates containing fibronectin-coated glass plates with  
76 MV2-endothelial cell basal medium (Promo Cell GmbH, Heidelberg, Germany) for 1 week.  
77 After 4 days medium was changed.

78

79 *EPC cultivation with conditioned medium.* Isolated EPCs were cultivated with MV2-  
80 endothelial cell basal medium containing 5% human blood serum of all measurement time  
81 points (pre, 10 min post, 4 h post) for 24 h. As a control medium, 5% fetal bovine serum  
82 (FBS) was used.

83

84 *β-galactosidase staining.* Cultivation medium was removed after 24 h of cultivation. EPCs  
85 were washed with PBS and fixated with a fixation solution containing PBS, 0,2%  
86 glutaraldehyde, 5mM EGTA (ethylene glycol-bis(β-aminoethyl ether)-N,N,N',N'-tetraacetic  
87 acid) and 2mM MgCl<sub>2</sub> for 15 min. After fixation EPCs were washed three times for 5 min  
88 with a wash solution containing PBS, 0,01% natrium-desoxycholate, 0,02% Nonident P40,  
89 5mM EGTA and 2mM MgCl<sub>2</sub>. Following, staining was performed for 24 h in the dark at  
90 37°C with a fresh prepared staining solution consisting of 10mM potassium ferricyanide  
91 (K<sub>3</sub>[Fe(CN)<sub>6</sub>]), 10mM potassium ferrocyanide (K<sub>4</sub>[Fe(CN)<sub>6</sub>]) and 1mg/ml X-gal (5-bromo-4-  
92 chloro-3-indolyl-β-D-galactopyranoside) added to the wash solution. After staining, cells  
93 were mounted with Vectashield (Vector Laboratories, Burlingame CA, USA) for conservation

94 and simultaneous staining of nuclei with DAPI. EPCs were analyzed with a fluorescence  
95 microscope (Axiophot, Zeiss GmbH, Jena, Germany) using fluorescence for counting all cells  
96 and light microscopy for  $\beta$ -Gal positive cells on the same device.

## 97 **Statistics**

98 Results are presented as means  $\pm$  SD. Because of the small sample size, results are discussed  
99 in a descriptive manner instead of performing inferential statistics.

100

## 101 **Results**

102 Participants had to abort the test after a duration ranging from 15 to 25 min resulting in a total  
103 time of 30-40 min spent in normobaric hypoxia. The  $\text{VO}_{2\text{ peak}}$  was  $56.7 \pm 7.7 \text{ ml} \cdot \text{kg}^{-1} \cdot \text{min}^{-1}$ .  
104 The senescence rate was measured after *in vitro* cultivation with serum collected pre, 10 min  
105 and 4 hours after acute exercise under hypoxia. As shown in Figure 1, senescence was  
106 reduced 10 min ( $0.72 \pm 0.57\%$ ) and 4 hours ( $0.67 \pm 0.52\%$ ) after exercise compared to pre  
107 ( $1.89 \pm 0.37\%$ ).

108 In comparison to *in vitro* cultivation with FBS and AHS, cultivation with FBS led to a much  
109 greater senescence rate ( $10.38 \pm 2.66\%$ ) than seen after all AHS conditions.

110

111 --- Figure 1 around here ---

112

## 113 **Discussion**

114 This pilot study indicates that *in vitro* cultivation of EPCs with conditioned media containing  
115 blood serum from exercise to exhaustion under normobaric hypoxia leads to a reduction in the  
116 senescence rate of EPCs. To the best of our knowledge, this is the first investigation  
117 demonstrating acute changes in EPC senescence in response to *in vitro* cultivation with blood  
118 serum before and after a single bout of intense hypoxic exercise. Investigating chronic  
119 adaptations, Wang et al. (2014) [10] showed an increase in the proliferative capacity of EPCs

after five weeks of hypoxic exercise training at 60%  $\text{VO}_{2\text{ max}}$  leading to a larger improvement in aerobic capacity compared to a normoxic exercise control group. Taken together, these findings indicate that the conditioning of blood serum through exercise under normobaric hypoxia induces promising effects on the endothelial system. In this context, especially hypoxia is known to induce the release of cytokines like vascular endothelial growth factor (VEGF), erythropoietin (EPO) and hepatocyte growth factor (HGF) into the circulation [14]. Ceradini and Gurtner [14] found a direct correlation of EPC activation and serum EPO. In addition, HGF was consistently increased which has been shown to stimulate angiogenesis even more efficiently than VEGF [15]. Maximizing oxygen deprivation through exercise under hypoxia may generate the necessary blood serum milieu to slow down EPC senescence in the later *in vitro* cultivation.

A reduction of EPC senescence would potentially be a crucial outcome in a clinical setting contributing to a higher EPC count, which has been shown to be a positive prognostic marker in several pathologies. Among others, Werner and colleagues [16] demonstrated that differences in CD34+KDR+ EPCs could predict cardiovascular outcomes in patients with coronary artery disease. In addition, a range of putative EPCs has been shown to be lower and associated with long-term mortality in type 2 diabetes compared to healthy controls [17,18].

Nonetheless, our study highlights immense differences in the cultivation of EPCs with AHS in contrast to commercial FBS-supplementation. Senescence of primary human EPCs was explicitly accelerated after cultivation with FBS. It should be kept in mind, that incubation of primary human EPCs with FBS challenges the cells, i.a. promoting senescence, and therefore may overlie the effects of other stimuli that were tested. This finding is in line with a recent review of Bauman and colleagues [19] concluding that the sustained use of FBS leads to inconsistencies in cell propagation protocols impeding data comparison among different studies and laboratories and therefore deaccelerates the progress in EPC research.

When reviewing this research it is important to acknowledge that the sample size was very small (n=4) and consequently was not large enough to detect any effect with statistical power, therefore limiting the ability to draw firm conclusions. However, our data contribute to the growing body of evidence supporting the clinical benefits of hypoxic exercise [10,20]. As the characteristics of optimal training stimulus in hypoxia are still largely unclear, future trials with homogenous clinical populations need to address which exercise intensity at which altitude for how long is feasible, and concurrently sufficient to alter EPC behavior including e.g. their senescence.



## **Acknowledgments**

The results of the study are presented clearly, honestly, and without fabrication, falsification, or inappropriate data manipulation.

## **Disclosures**

This research did not receive any specific grant from funding agencies in the public, commercial, or not-for-profit sectors. All authors declare that there are no financial and personal relationships with third parties or organizations that could have inappropriately influenced the present work.

## References

- [1] T. Asahara, T. Murohara, A. Sullivan, M. Silver, R. van der Zee, T. Li, et al., Isolation of Putative Progenitor Endothelial Cells for Angiogenesis, *Science* 275 (1997) 964–966.
- [2] S. Dimmeler, Regulation of bone marrow-derived vascular progenitor cell mobilization and maintenance, *Arteriosclerosis, thrombosis, and vascular biology* 30 (2010) 1088–1093.
- [3] C. Kalka, H. Masuda, T. Takahashi, W.M. Kalka-Moll, M. Silver, M. Kearney, et al., Transplantation of ex vivo expanded endothelial progenitor cells for therapeutic neovascularization, *Proceedings of the National Academy of Sciences of the United States of America* 97 (2000) 3422–3427.
- [4] M.-T. Liao, W.-C. Liu, F.-H. Lin, C.-F. Huang, S.-Y. Chen, C.-C. Liu, et al., Intradialytic aerobic cycling exercise alleviates inflammation and improves endothelial progenitor cell count and bone density in hemodialysis patients, *Medicine* 95 (2016) e4134.
- [5] M. Sandri, V. Adams, S. Gielen, A. Linke, K. Lenk, N. Kränkel, et al., Effects of exercise and ischemia on mobilization and functional activation of blood-derived progenitor cells in patients with ischemic syndromes, *Circulation* 111 (2005) 3391–3399.
- [6] S. Steiner, A. Niessner, S. Ziegler, B. Richter, D. Seidinger, J. Pleiner, et al., Endurance training increases the number of endothelial progenitor cells in patients with cardiovascular risk and coronary artery disease, *Atherosclerosis* 181 (2005) 305–310.
- [7] H.-H. Tsai, C.-P. Lin, Y.-H. Lin, C.-C. Hsu, J.-S. Wang, High-intensity Interval training enhances mobilization/functionality of endothelial progenitor cells and depressed shedding of vascular endothelial cells undergoing hypoxia, *European journal of applied physiology* 116 (2016) 2375–2388.

- [8] E.M.F. van Craenenbroeck, C.J. Vrints, S.E. Haine, K. Vermeulen, I. Goovaerts, V.F.I. van Tendeloo, et al., A maximal exercise bout increases the number of circulating CD34+/KDR+ endothelial progenitor cells in healthy subjects. Relation with lipid profile, *Journal of applied physiology* (Bethesda, Md. 1985) 104 (2008) 1006–1013.
- [9] M.M. Ciulla, M. Cortiana, I. Silvestris, E. Matteucci, E. Ridolfi, F. Giofrè, et al., Effects of simulated altitude (normobaric hypoxia) on cardiorespiratory parameters and circulating endothelial precursors in healthy subjects, *Respiratory research* 8 (2007) 58.
- [10] J.-S. Wang, M.-Y. Lee, H.-Y. Lien, T.-P. Weng, Hypoxic exercise training improves cardiac/muscular hemodynamics and is associated with modulated circulating progenitor cells in sedentary men, *International journal of cardiology* 170 (2014) 315–323.
- [11] K. Sonnenschein, T. Horváth, M. Mueller, A. Markowski, T. Siegmund, C. Jacob, et al., Exercise training improves in vivo endothelial repair capacity of early endothelial progenitor cells in subjects with metabolic syndrome, *European journal of cardiovascular prevention and rehabilitation official journal of the European Society of Cardiology, Working Groups on Epidemiology & Prevention and Cardiac Rehabilitation and Exercise Physiology* 18 (2011) 406–414.
- [12] F. Suhr, K. Brixius, M. de Marées, B. Bölck, H. Kleinöder, S. Achtzehn, et al., Effects of short-term vibration and hypoxia during high-intensity cycling exercise on circulating levels of angiogenic regulators in humans, *Journal of applied physiology* (Bethesda, Md. 1985) 103 (2007) 474–483.
- [13] F. Funcke, H. Hoyer, F. Brenig, C. Steingen, D. Ladage, J. Müller-Ehmsen, et al., Characterisation of the interaction between circulating and in vitro cultivated endothelial progenitor cells and the endothelial barrier, *European journal of cell biology* 87 (2008) 81–90.

- 219 [14] D.J. Ceradini, G.C. Gurtner, Homing to hypoxia, Trends in cardiovascular medicine 15  
220 (2005) 57–63.
- 221 [15] E. van Belle, B. Witzenbichler, D. Chen, M. Silver, L. Chang, R. Schwall, et al.,  
222 Potentiated angiogenic effect of scatter factor/hepatocyte growth factor via induction of  
223 vascular endothelial growth factor, Circulation 97 (1998) 381–390.
- 224 [16] N. Werner, S. Kiosol, T. Schiegl, P. Ahlers, K. Walenta, A. Link, et al., Circulating  
225 endothelial progenitor cells and cardiovascular outcomes, The New England journal of  
226 medicine 353 (2005) 999–1007.
- 227 [17] C.G. Egan, C. Fondelli, E. Pierantozzi, G. Tripepi, F. Dotta, V. Sorrentino, Putative  
228 endothelial progenitor cells predict long-term mortality in type-2 diabetes, Endocrine 62  
229 (2018) 263–266.
- 230 [18] C.G. Egan, R. Lavery, F. Caporali, C. Fondelli, F. Laghi-Pasini, F. Dotta, et al.,  
231 Generalised reduction of putative endothelial progenitors and CXCR4-positive  
232 peripheral blood cells in type 2 diabetes, Diabetologia 51 (2008) 1296–1305.
- 233 [19] E. Bauman, P.L. Granja, C.C. Barrias, Fetal bovine serum-free culture of endothelial  
234 progenitor cells - progress and challenges, Journal of tissue engineering and  
235 regenerative medicine (2018).
- 236 [20] R. Mackenzie, N. Maxwell, P. Castle, B. Elliott, G. Brickley, P. Watt, Intermittent  
237 exercise with and without hypoxia improves insulin sensitivity in individuals with type  
238 2 diabetes, The Journal of clinical endocrinology and metabolism 97 (2012) E546-55.
- 239

240 **Figure captions**

241 **Figure 1.** Senescence rate of endothelial progenitor cells (EPCs) after *in vitro* cultivation of  
242 EPCs with either fetal bovine serum (FBS) or autologous human serum (AHS) at pre, post  
243 10min and post 4h.  
244

**Table 1** Anthropometric data and physical parameters (n=4); Mean  $\pm$  SD

|                         |                |
|-------------------------|----------------|
| Age [years]             | 23 $\pm$ 2     |
| Height [cm]             | 181 $\pm$ 6    |
| Body weight [kg]        | 74.9 $\pm$ 8.7 |
| Training hours per week | 10.3 $\pm$ 3.7 |

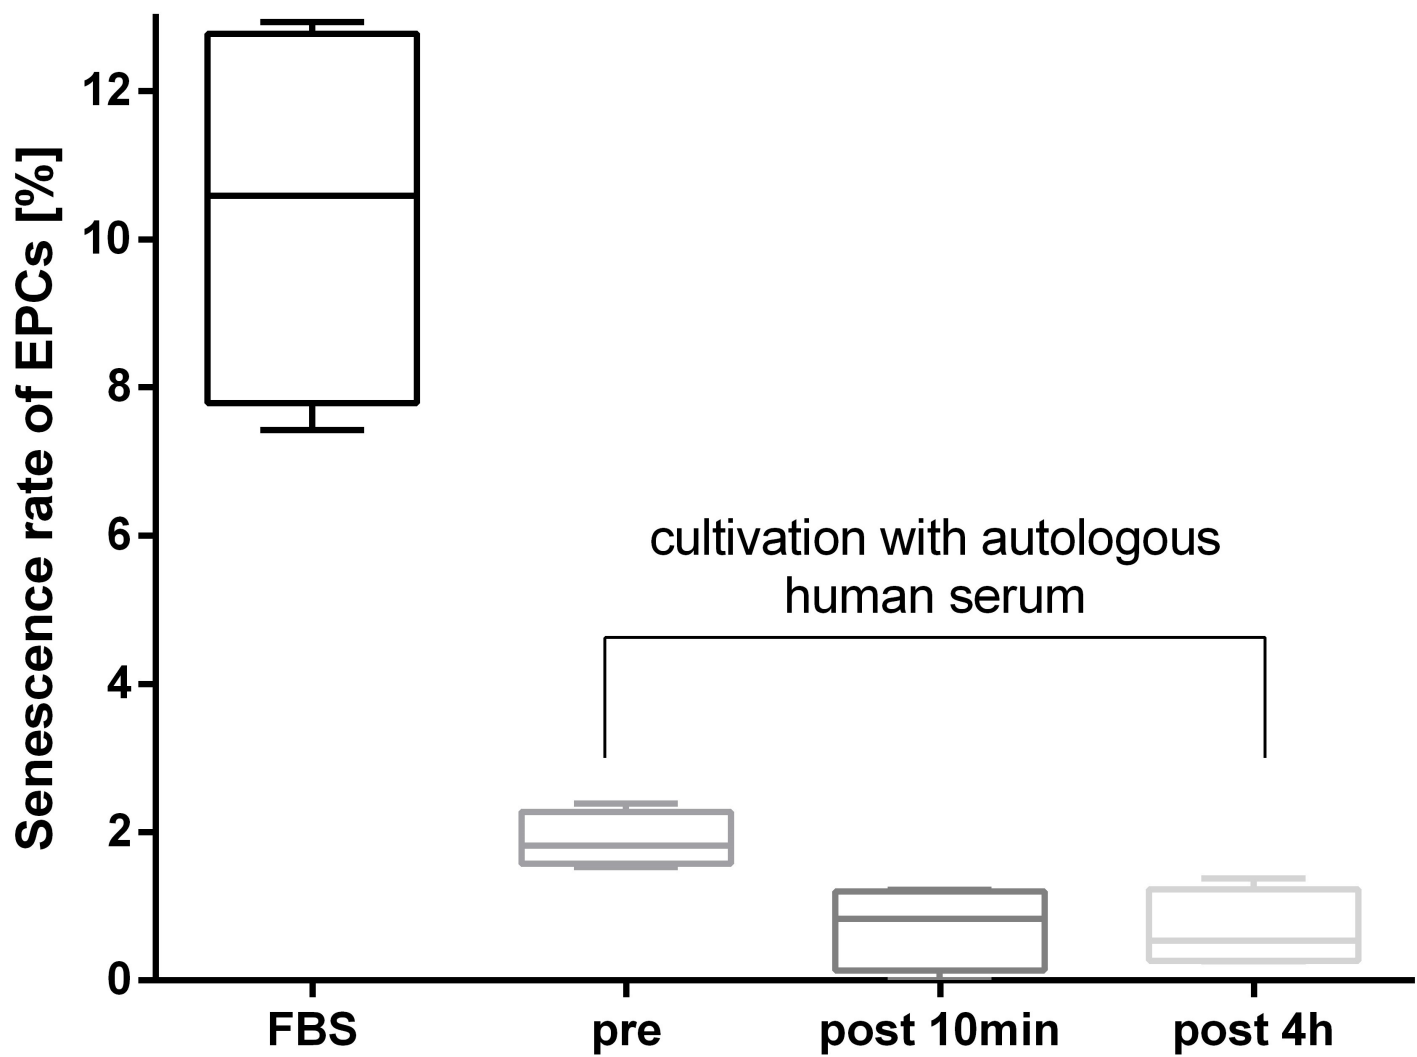

Source: https://www.biorxiv.org/content/10.1101/2020.02.16.949677v1.full.pdf
